# Supplementary material for: MRI-based assessment of the pineal gland in a large population of children aged 0–5 years and comparison with pineoblastoma: part II, the cystic gland
Source: PubMed Central journal article supplement (PMC4958131; doi:10.1007/s00234-016-1683-0), 2016-04-29
Supplement: 234_2016_1683_MOESM1_ESM.pdf [file 234_2016_1683_MOESM1_ESM.pdf]

## ONLINE APPEDICES

**Appendix A.** Two-way analysis of variance of gland sizes across age categories by gender.

| <b>Width</b>      | <i>(Lavene's test: p=0.19; adjusted R<sup>2</sup>=0.22)</i> | <b>Sum of squares</b> | <b>Degrees of freedom</b> | <b>of</b> | <b>Mean square</b> | <b>F</b> | <b>P value</b> |
|-------------------|-------------------------------------------------------------|-----------------------|---------------------------|-----------|--------------------|----------|----------------|
| Gender            |                                                             | 3.70                  | 1                         |           | 3.70               | 1.03     | 0.31           |
| Age               |                                                             | 253.20                | 4                         |           | 63.30              | 17.56    | <0.0001        |
| Gender*age        |                                                             | 26.00                 | 4                         |           | 6.50               | 1.80     | 0.13           |
| Within (error)    |                                                             | 800.12                | 222                       |           | 3.60               |          |                |
| Total             |                                                             | 11929.39              | 232                       |           |                    |          |                |
| <b>Height</b>     | <i>(Lavene's test: p=0.24; adjusted R<sup>2</sup>=0.12)</i> | <b>Sum of squares</b> | <b>Degrees of freedom</b> | <b>of</b> | <b>Mean square</b> | <b>F</b> | <b>P value</b> |
| Gender            |                                                             | 0.26                  | 1                         |           | .26                | .13      | 0.72           |
| Age               |                                                             | 66.25                 | 4                         |           | 16.56              | 8.60     | <0.0001        |
| Gender*age        |                                                             | 13.96                 | 4                         |           | 3.49               | 1.81     | 0.13           |
| Within (error)    |                                                             | 427.39                | 222                       |           | 1.93               |          |                |
| Total             |                                                             | 5174.51               | 232                       |           |                    |          |                |
| <b>Area†</b>      | <i>(Lavene's test: p=0.40; adjusted R<sup>2</sup>=0.25)</i> | <b>Sum of squares</b> | <b>Degrees of freedom</b> | <b>of</b> | <b>Mean square</b> | <b>F</b> | <b>P value</b> |
| Gender            |                                                             | 0.06                  | 1                         |           | 0.06               | 0.23     | 0.63           |
| Age               |                                                             | 20.21                 | 4                         |           | 5.05               | 20.06    | <0.0001        |
| Gender*age        |                                                             | 1.66                  | 4                         |           | 0.41               | 1.64     | 0.16           |
| Within (error)    |                                                             | 55.91                 | 222                       |           | 0.25               |          |                |
| Total             |                                                             | 2287.71               | 232                       |           |                    |          |                |
| <b>Cyst size‡</b> | <i>(Lavene's test: p=0.38; adjusted R<sup>2</sup>=0.13)</i> | <b>Sum of squares</b> | <b>Degrees of freedom</b> | <b>of</b> | <b>Mean square</b> | <b>F</b> | <b>P value</b> |
| Gender            |                                                             | 4.60                  | 1                         |           | 4.60               | .732     | 0.39           |
| Age               |                                                             | 206.93                | 4                         |           | 51.73              | 8.231    | <0.0001        |
| Gender*age        |                                                             | 80.51                 | 4                         |           | 20.13              | 3.202    | 0.014          |
| Within (error)    |                                                             | 1395.25               | 222                       |           | 6.28               |          |                |
| Total             |                                                             | 6613.07               | 232                       |           |                    |          |                |

†Log transformed to meet the homoscedasticity assumption. ‡Maximum diameter of the cyst(s) within the pineal gland.
