# Supplementary material for: MRI-based assessment of the pineal gland in a large population of children aged 0–5 years and comparison with pineoblastoma: part II, the cystic gland
Source: PubMed Central journal article supplement (PMC4958131; doi:10.1007/s00234-016-1683-0), 2016-04-29
Supplement: 234_2016_1683_MOESM2_ESM.pdf [file 234_2016_1683_MOESM2_ESM.pdf]

**Appendix B.** Post hoc tests of the difference between age categories: Tukey's honestly significant difference test

| Age categories<br>(months) | Age categories<br>(months) | Cyst size<br>(p value) | Width<br>(p value) | Height<br>(p value) | Area<br>(p value) |
|----------------------------|----------------------------|------------------------|--------------------|---------------------|-------------------|
| [0,12)                     | [12,24)                    | 0.0002                 | <0.0001            | 0.0015              | <0.0001           |
|                            | [24,36)                    | 0.0005                 | <0.0001            | <0.0001             | <0.0001           |
|                            | [36,48)                    | 0.0017                 | <0.0001            | 0.0059              | <0.0001           |
|                            | [48,60]                    | 0.11                   | <0.0001            | 0.036               | <0.0001           |
| [12,24)                    | [0,12)                     | 0.0002                 | <0.0001            | 0.0015              | <0.0001           |
|                            | [24,36)                    | 0.98                   | 0.46               | 0.95                | 0.79              |
|                            | [36,48)                    | 1.00                   | 0.84               | 1.00                | 0.95              |
|                            | [48,60]                    | 0.54                   | 0.99               | 0.94                | 1.00              |
| [24,36)                    | [0,12)                     | 0.0005                 | <0.0001            | <0.0001             | <0.0001           |
|                            | [12,24)                    | 0.98                   | 0.46               | 0.95                | 0.79              |
|                            | [36,48)                    | 0.96                   | 1.00               | 0.99                | 1.00              |
|                            | [48,60]                    | 0.80                   | 0.76               | 0.54                | 0.70              |
| [36,48)                    | [0,12)                     | 0.0017                 | <0.0001            | 0.0059              | <0.0001           |
|                            | [12,24)                    | 1.00                   | 0.84               | 1.00                | 0.95              |
|                            | [24,36)                    | 0.96                   | 1.00               | 0.99                | 1.00              |
|                            | [48,60]                    | 0.56                   | 0.97               | 0.91                | 0.91              |
| [48,60]                    | [0,12)                     | 0.11                   | <0.0001            | 0.036               | <0.0001           |
|                            | [12,24)                    | 0.54                   | 0.99               | 0.94                | 1.00              |
|                            | [24,36)                    | 0.80                   | 0.76               | 0.54                | 0.70              |
|                            | [36,48)                    | 0.56                   | 0.97               | 0.91                | 0.91              |
