# Supplementary material for: MRI-based assessment of the pineal gland in a large population of children aged 0–5 years and comparison with pineoblastoma: part II, the cystic gland
Source: PubMed Central journal article supplement (PMC4958131; doi:10.1007/s00234-016-1683-0), 2016-04-29

**Appendix D.** Quadratic regression line with 99% prediction intervals of width (A), height (B), area (C) and cyst size (D).

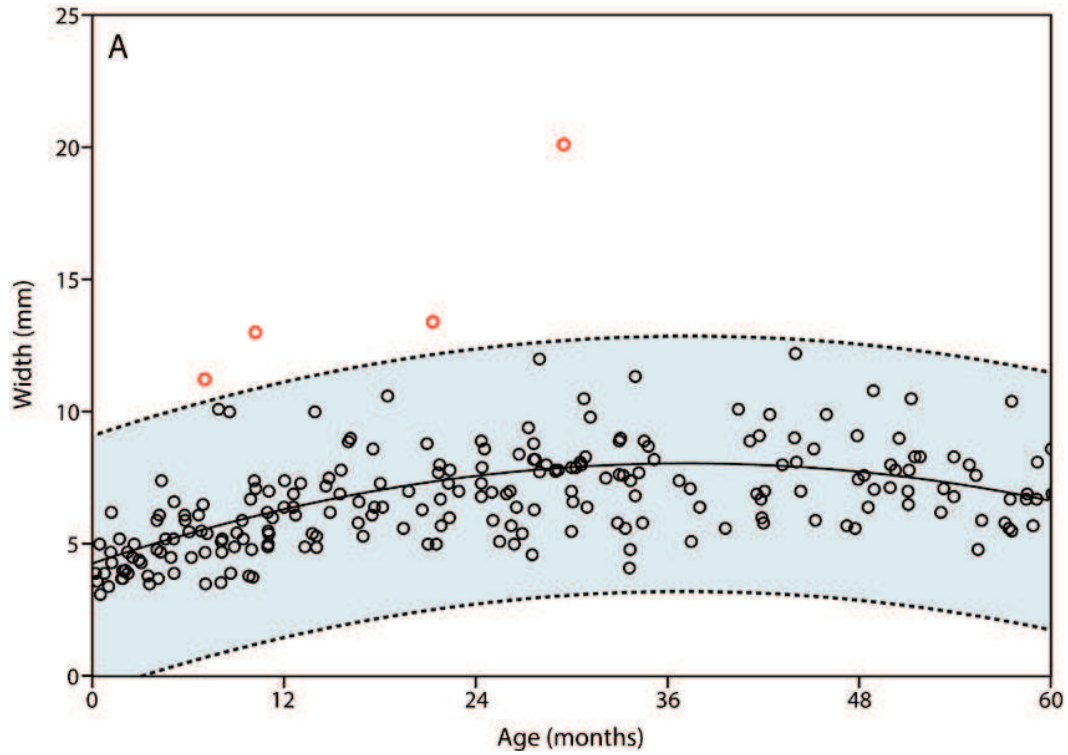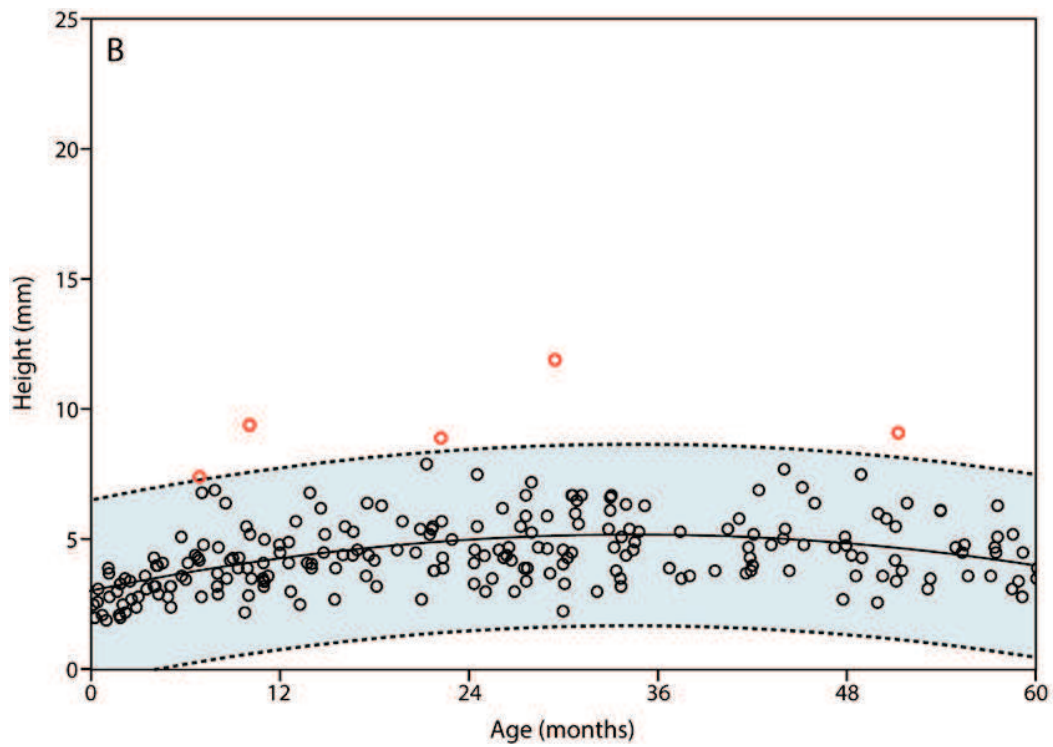

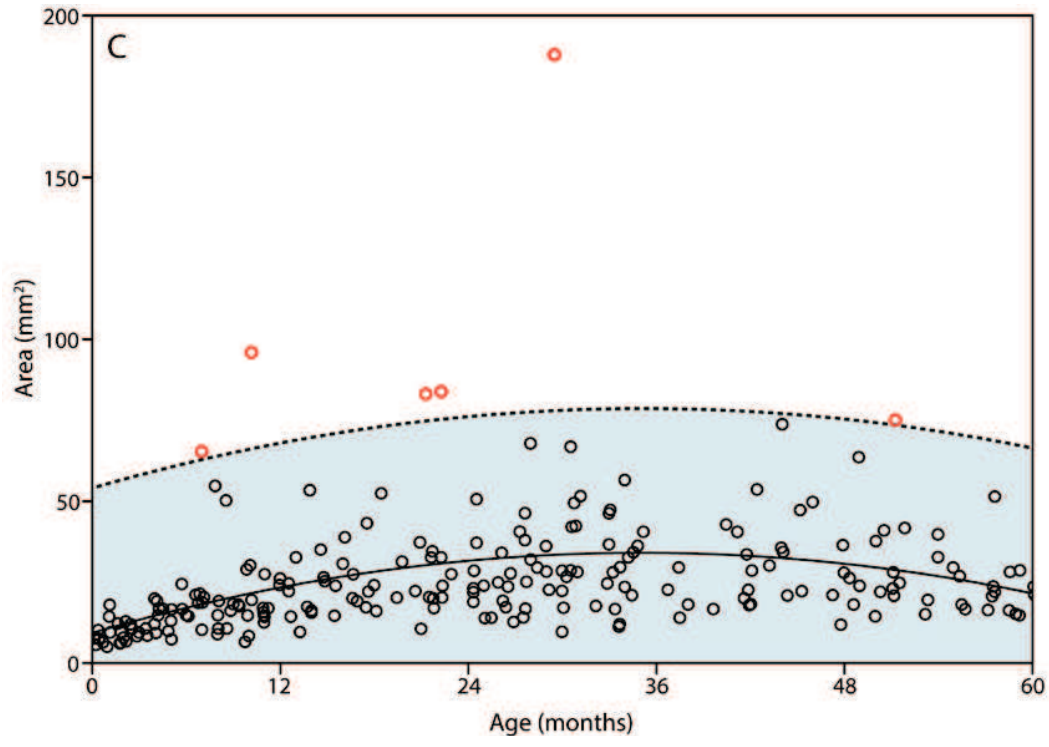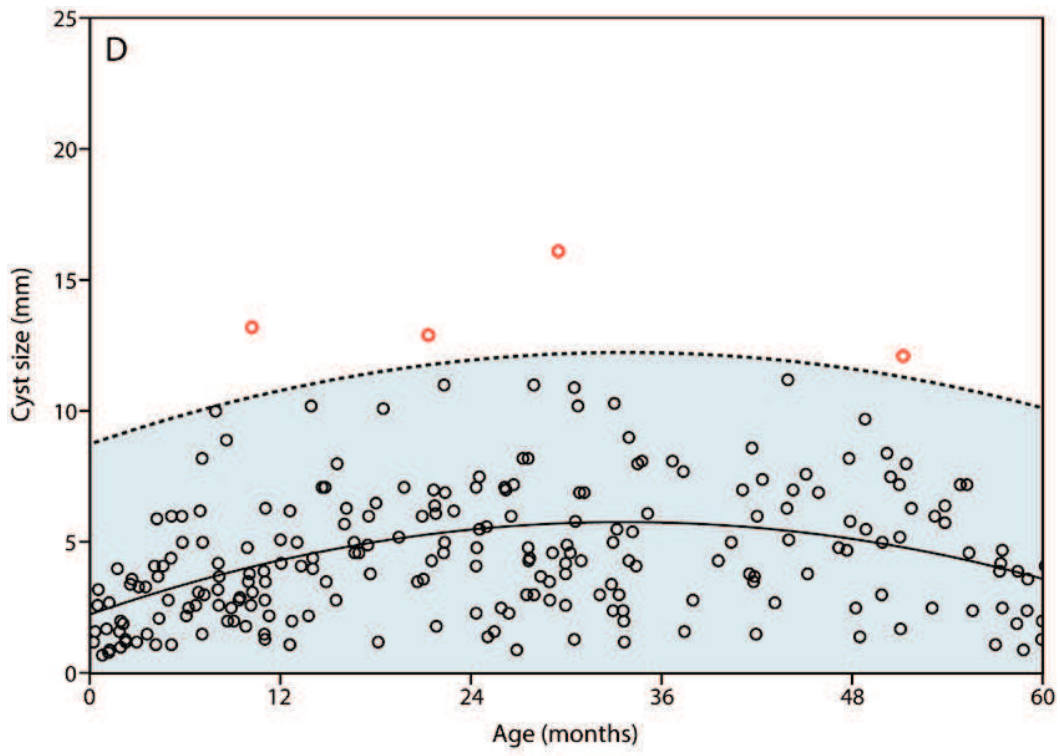

Supplement: 234_2016_1683_MOESM4_ESM.pdf [file 234_2016_1683_MOESM4_ESM.pdf]
