# Supplementary material for: MRI-based assessment of the pineal gland in a large population of children aged 0–5 years and comparison with pineoblastoma: part II, the cystic gland
Source: Springer Nature journal article supplement (doi:10.1007/s00234-016-1683-0), 2016-04-29

**Appendix E.** Results of quadratic regression analysis: cystic pineal gland size versus age.

| Relationship              | Mean intercept (mm)               | Upper bound (mm)*               | Coefficient (mm/month)            | P value | Coefficient (mm/month <sup>2</sup> )            | P value | Adjusted R <sup>2</sup> |
|---------------------------|-----------------------------------|---------------------------------|-----------------------------------|---------|-------------------------------------------------|---------|-------------------------|
| <i>Cyst size‡ vs. age</i> | 2.3                               | 8.8                             | 0.209                             | <0.0001 | -0.00311                                        | <0.0001 | 0.15                    |
| <i>Width vs. age</i>      | 4.3                               | 9.2                             | 0.202                             | <0.0001 | -0.00271                                        | <0.0001 | 0.26                    |
| <i>Height vs. age</i>     | 3.0                               | 6.6                             | 0.126                             | <0.0001 | -0.00182                                        | <0.0001 | 0.18                    |
| Relationship              | Mean intercept (mm <sup>2</sup> ) | Upper bound (mm <sup>2</sup> )* | Function (mm <sup>2</sup> /month) | p value | Function (mm <sup>2</sup> /month <sup>2</sup> ) | p value | Adjusted R <sup>2</sup> |
| <i>Area vs. age</i>       | 9.3                               | 54.7                            | 1.410                             | <0.0001 | -0.02008                                        | <0.0001 | 0.15                    |

\*The upper 99% prediction bound has approximately the same function as the regression line; therefore the slope of the linear regression line can be used. ‡Maximum diameter of the cyst(s) within the pineal gland.

**Appendix F.** Mean gland areas of male and female cases for each cyst classification.

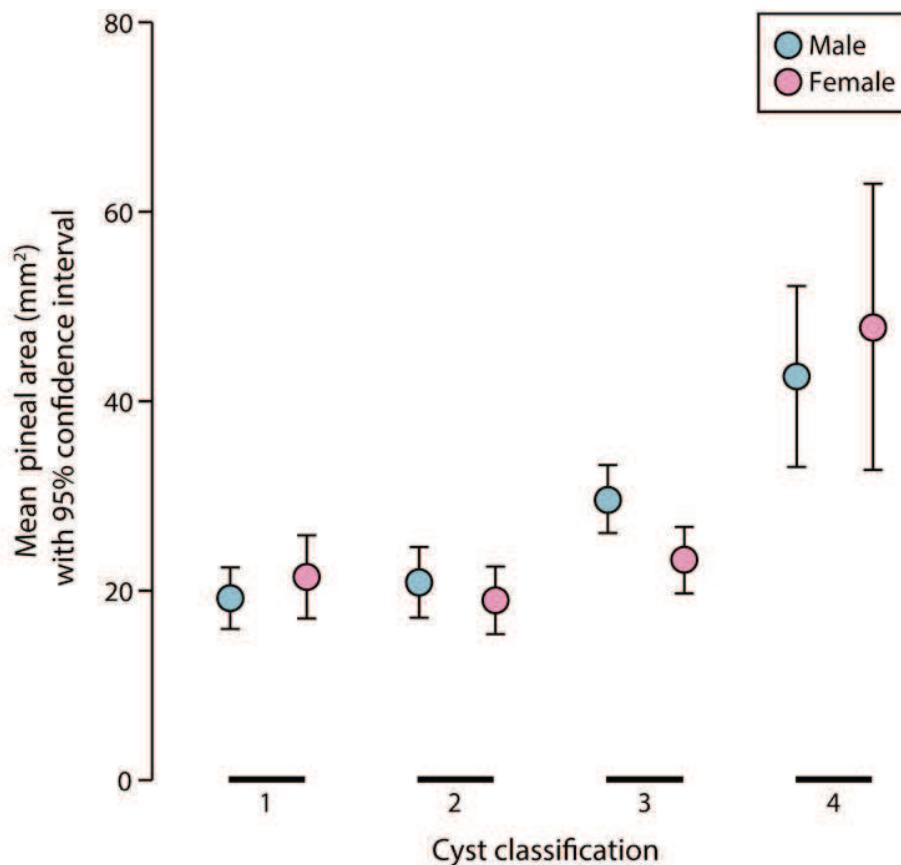

Supplement: MOESM5 [file 10103424]
